# Supplementary material
Source: Frontiers journal article supplement (https://www.frontiersin.org/articles/454676)
Supplement: Data_Sheet_1.PDF [file Data_Sheet_1.PDF]

# Supplementary Material: Feeling stressed or strained? A biophysical model for cell wall mechanosensing in plants

Antoine Fruleux, Stéphane Verger, and Arezki Boudaoud

We present one-dimensional models for sensors associated with a major or a minor load-bearing structure, and analyse their response to stress and strain rate.

## 1 CELL WALL

We model the cell wall as a viscoelastoplastic material, represented by a spring of elastic modulus  $K_w$  in series with a dashpot of viscosity  $\eta_w$  in parallel with a frictional block of yield stress  $Y$  (Fig. 3). The cell wall dynamics is governed by

$$\frac{\dot{\sigma}}{K_w} + \frac{\sigma(t) - Y}{\eta_w} = \gamma, \quad (S1)$$

where  $\sigma$  is the cell wall tension, the dot stands for the derivative with respect to time  $t$ , and  $\gamma$  is the strain rate that combines growth (irreversible expansion) and elastic deformations. The comparison of the viscous and the elastic term in (S1) yields a relaxation time  $\tau_w = \eta_w/K_w$ .  $Y$  is the yield stress above which the wall starts to show viscous properties.  $\eta_w$  therefore depends on the wall tension  $\sigma$  and the threshold  $Y$ ,

$$\eta_w = \begin{cases} \eta_0 & \text{if } \sigma > Y, \\ +\infty & \text{if } \sigma < Y. \end{cases} \quad (S2)$$

For simplicity, we also consider the stress in excess of the threshold  $\tilde{\sigma} = \sigma - Y$ .

## 2 SENSOR ASSOCIATED WITH A MINOR LOAD-BEARING STRUCTURE

### 2.1 Model

The sensor is assumed to be inserted into a visco-elastic medium in parallel to the wall (Figs. 4A,B). An elastic modulus  $K_s$  accounts for the effective elastic properties of the sensor and the structure in which it is inserted, whereas a viscous coefficient  $\eta_s$  accounts for the viscosity of the structure. The relaxation time above which the medium exhibit viscous behaviour is  $\tau_s = \eta_s/K_s$ . Given that the cell wall has a relaxation dominated by its slowest component, it is expected that  $\tau_s$  is at most comparable in magnitude to  $\tau_w$ .

The impedance of the structure in which the sensor is assumed small. Therefore, the force exerted on the sensor  $F$  is small as compared to the force in the overall cell wall  $\sigma$ , and is governed by

$$\frac{\dot{F}(t)}{K_s} + \frac{F(t)}{\eta_s} = \frac{\dot{\sigma}(t)}{K_w} + \frac{\tilde{\sigma}(t)}{\eta_w}. \quad (S3)$$

## 2.2 Response to a stress

We first study the response of such sensor to stress. Equation (S3) yields

$$F(t) = \frac{\eta_s}{\eta_w} \left[ \frac{\tau_w}{\tau_s} \Delta_{\tau_s} \tilde{\sigma}(t) + \langle \tilde{\sigma}(t) \rangle_{\tau_s} \right] \quad (\text{S4})$$

where

$$\langle \tilde{\sigma}(t) \rangle_{\tau_s} = \int_{-\infty}^0 \frac{d\tau}{\tau_s} e^{\frac{\tau}{\tau_s}} \tilde{\sigma}(t + \tau) \quad (\text{S5})$$

is the slow tend of stress  $\tilde{\sigma}$  and

$$\Delta_{\tau_s} \tilde{\sigma}(t) = \tilde{\sigma}(t) - \langle \tilde{\sigma}(t) \rangle_{\tau_s} \quad (\text{S6})$$

contains its fast variations. If the structure relaxes much faster than the cell wall ( $\tau_s \ll \tau_w$ ), slow fluctuations are filtered out. Assuming stress fluctuations comparable in magnitude to average stress, the sensor is then mainly sensitive to the fast fluctuations of the stress (of timescales under  $\tau_s$ ). If the structure and the wall have similar relaxation times ( $\tau_s \sim \tau_w$ ), then the sensor is sensitive to both fast and slow wall stress fluctuations.

## 2.3 Response to growth

We now study the response of such sensor to strain rate. The relation between the force exerted on the sensor and the expansion rate  $\gamma$  is found to be

$$F(t) = \eta_s \langle \gamma(t) \rangle_{\tau_s} \quad (\text{S7})$$

where  $\langle \gamma(t) \rangle_{\tau_s}$  is the expansion rate where fast variations (with timescales below  $\tau_s$ ) are filtered, defined as in Eq. (S5).

# 3 SENSOR ASSOCIATED WITH A MAJOR LOAD-BEARING STRUCTURE

## 3.1 Model

### 3.1.1 Constitutive law

We model this wall sensor as a spring of strength  $k_s$  in parallel with a segment of the cell wall. We write the elastic and viscous coefficients of the segment of the wall  $k_w$  and  $\alpha_w$ . If  $l_s$  is the size of the wall sensor, then we estimate  $k_w \sim \frac{K_w}{l_s}$ ,  $\alpha_w \sim \frac{\eta_w}{l_s}$ , and  $\frac{\alpha_w}{k_w} \sim \tau_w$ . For simplicity, we consider  $\alpha_w/k_w = \tau_w$  in the following. We make the reasonable assumption that the sensor is much less stiff than the wall, so that  $F \ll \sigma$ . As a result, wall expansion forces the extension of the sensor, so that the the force in the sensor is governed by

$$\frac{\dot{F}}{k_s} = \frac{\dot{\tilde{\sigma}}}{k_w} + \frac{\tilde{\sigma}}{\alpha_w}. \quad (\text{S8})$$

### 3.1.2 Dissociation

The sensor is stretched by the cell wall until it dissociates. The dissociation rate  $1/\tau_d$  of the sensor must depend on the force in the sensor  $1/\tau_d = 1/\tau_c f(F/F_c)$ , where  $\tau_c$  is the characteristic dissociation rate and  $F_c$  is the typical force above which dissociation systematically occurs. If the sensor is able to reach forces

of magnitude  $\sim F_c$  in times smaller than  $\tau_c$ , then wall tension is mostly reflected by the lifetime  $\tau_d$  of the sensor, else the wall tension is mostly reflected by the force at which the sensor dissociates.

### 3.2 Response to stress

We first study the response of such sensor to stress. The relation between the force  $F$  exerted on a sensor associated at time  $t_a$  and the stress of the cell wall is deduced from Eq. (S8):

$$F(t) = \frac{k_s}{k_w} \left[ \{\tilde{\sigma}(t) - \tilde{\sigma}(t_a)\} + \frac{t - t_a}{\tau_w} \langle \langle \tilde{\sigma}(t) \rangle \rangle_{t-t_a} \right], \quad (\text{S9})$$

where

$$\langle \langle \tilde{\sigma}(t) \rangle \rangle_{t-t_a} = \int_{t_a-t}^0 \frac{d\tau}{t-t_a} \tilde{\sigma}(t+\tau) \quad (\text{S10})$$

is the stress smoothed with a resolution  $t - t_a$ . The sensor response to mechanical signals depends on the value of the dissociation force as discussed in the next subsections.

#### 3.2.1 High dissociation force

Let  $\delta_{\tau_c} \tilde{\sigma}$  be the magnitude of wall stress fluctuations at a timescale smaller than  $\tau_c$ . If  $F_c \gg k_s/k_w \delta_{\tau_c} \tilde{\sigma}$  and  $F_c \gg k_s/k_w \tau_c/\tau_w \langle \langle \tilde{\sigma}(t) \rangle \rangle_{t-t_a}$ , then the sensor detaches after  $\tau_d \sim \tau_c$ , with a force

$$F(t) \sim \frac{k_s}{k_w} \left[ \{\tilde{\sigma}(t) - \tilde{\sigma}(t - \tau_c)\} + \frac{\tau_c}{\tau_w} \langle \langle \tilde{\sigma}(t) \rangle \rangle_{\tau_c} \right]. \quad (\text{S11})$$

For  $\tau_c/\tau_w \ll 1$ , the sensor is sensitive to fast variations of the wall stress, which correspond to the elastic behaviour of the cell wall. In contrast, for  $\tau_c/\tau_w \gg 1$ , the sensor is sensitive to slow variations of the wall stress.

#### 3.2.2 Low dissociation force

For low dissociation force, when  $F_c \ll k_s/k_w \delta_{\tau_c} \tilde{\sigma}$  or  $F_c \ll k_s/k_w \tau_c/\tau_w \langle \langle \tilde{\sigma}(t) \rangle \rangle_{\tau_d}$ , then the sensor dissociates when  $F \sim F_c$ . In this case, the sensor is very sensitive to fast variations of wall stress. When the wall stress  $\delta_{\tau_d} \tilde{\sigma}$  varies much faster than  $\tau_w$ , the dissociation frequency is  $1/\tau_d \sim 1/\tau_c k_s/k_w \delta_{\tau_d} \tilde{\sigma}/F_c$ . When the wall stress varies much slower than  $\tau_w$ , the rate of dissociation is sensitive to such slow variations,  $1/\tau_d \sim 1/\tau_w k_s/k_w \langle \langle \tilde{\sigma}(t) \rangle \rangle_{\tau_d}/F_c$ .

### 3.3 Response to growth

We now study the response to strain rate. The relation between the force exerted on a sensor  $F$  associated at a time  $t_a$  and the growth rate of the cell wall is deduced from Eqs. (S1,S9):

$$F(t) = (t - t_a) k_s \langle \langle \gamma(t) \rangle \rangle_{t-t_a}, \quad (\text{S12})$$

where  $\langle \langle \gamma(t) \rangle \rangle_{t-t_a}$  is the expansion rate smoothed at timescale  $t - t_a$ , like in Eq. (S10). Depending on the value of the dissociation force, the sensor will respond differently to mechanical signals. For high dissociation force  $F_c \gg \tau_c k_s \langle \langle \gamma(t) \rangle \rangle_{\tau_c}$ , the sensor dissociates for a force  $F(t) \sim \tau_c k_s \langle \langle \gamma(t) \rangle \rangle_{\tau_c}$ , after a time  $\tau_d \sim \tau_c$ . For low dissociation force,  $F_c \ll \tau_c k_s \langle \langle \gamma(t) \rangle \rangle_{\tau_c}$ , the sensor dissociates for a force  $F \sim F_c$  and the frequency of dissociations is  $1/\tau_d \sim k_s \langle \langle \gamma(t) \rangle \rangle_{\tau_d}/F_c$ .
